# Supplementary material
Source: Royal Society of Chemistry journal article supplement (doi:10.1039/d6cp00490c)
Supplement: d6cp00490c1.pdf [file d6cp00490c1.pdf]

Electronic Supplementary Information

**Diffusion Mechanisms of Janus Nanoparticles in Cross-Linked  
Polymer Networks**

Zhi-Tao Liu<sup>a</sup>, Bo-Ran Zhao<sup>a,b</sup>, Bin Li<sup>\*a</sup>

<sup>a</sup> School of Chemical Engineering and Technology, Sun Yat-sen University, Zhuhai, 519082, China.

<sup>b</sup> Advanced Materials Thrust, Function Hub, The Hong Kong University of Science and Technology  
(Guangzhou), Guangzhou 511400, China.

\*E-mail: [libin76@mail.sysu.edu.cn](mailto:libin76@mail.sysu.edu.cn)

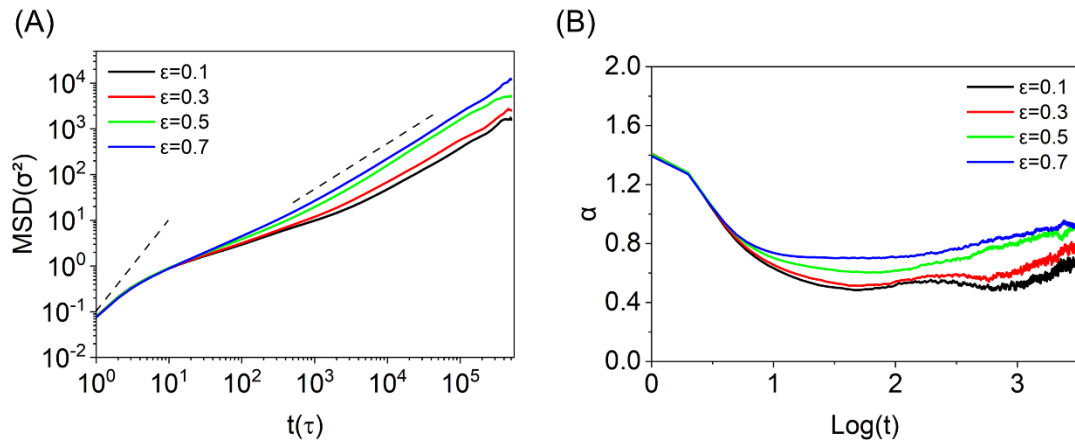

Fig. S1 Diffusion dynamics of JNPs with the adhesive component fixed at  $\varepsilon=0.9k_B T$  and the non-adhesive side varied from  $0.1$  to  $0.7k_B T$  in semi-flexible networks ( $k_a = 25k_B T/\text{rad}^2$ ). (A) Mean square displacement (MSD); (B) anomalous diffusion exponent  $\alpha$  corresponding to the MSD in (A).

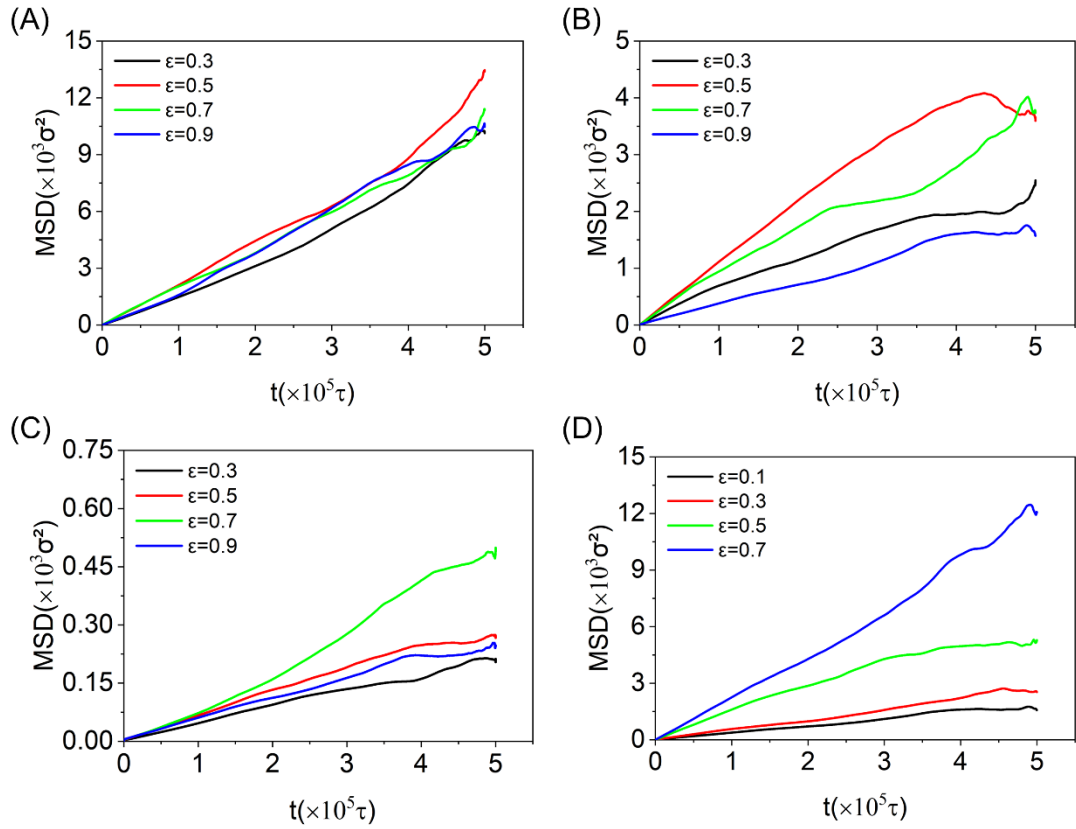

Fig. S2 Linear plots of the MSDs of the JNPs with varying interactions with cross-linked networks. (A-C)  $\epsilon$  of non-adhesive component of JNP was fixed at  $0.1 \text{ k}_B T$  in soft, semi-flexible and rigid networks ( $k_a = 2.5, 25$  and  $250 \text{ k}_B T / \text{rad}^2$ , respectively); (D)  $\epsilon$  of adhesive component of JNP was fixed at  $0.9 \text{ k}_B T$  in semi-flexible network.

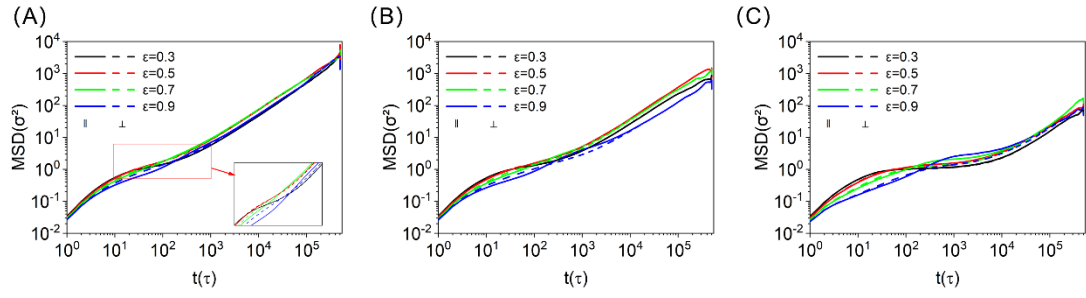

Fig. S3 MSD components of parallel and perpendicular to the major axes of JNPs with the non-adhesive component fixed at  $\epsilon = 0.1k_B T$  in cross-linked networks of varying stiffness. (A) soft network ( $k_a = 2.5k_B T/\text{rad}^2$ ), (B) semi-flexible network ( $k_a = 25k_B T/\text{rad}^2$ ), (C) rigid network ( $k_a = 250k_B T/\text{rad}^2$ ). The adhesive-side  $\epsilon$  is varied from 0.3 to  $0.9k_B T$ .

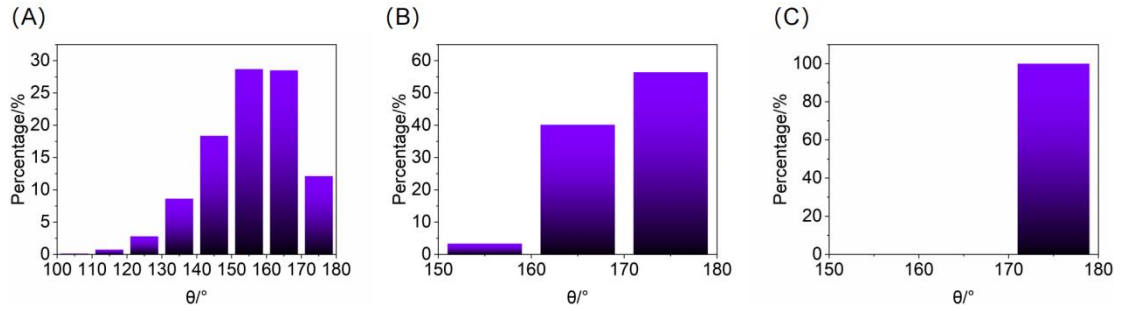

Fig. S4 Probability distribution of angles of every three consecutive CG beads in the network cell where the JNPs locate. (A) soft network ( $k_a = 2.5k_B T/\text{rad}^2$ ), (B) semi-flexible network ( $k_a = 25k_B T/\text{rad}^2$ ), (C) rigid network ( $k_a = 250k_B T/\text{rad}^2$ ).

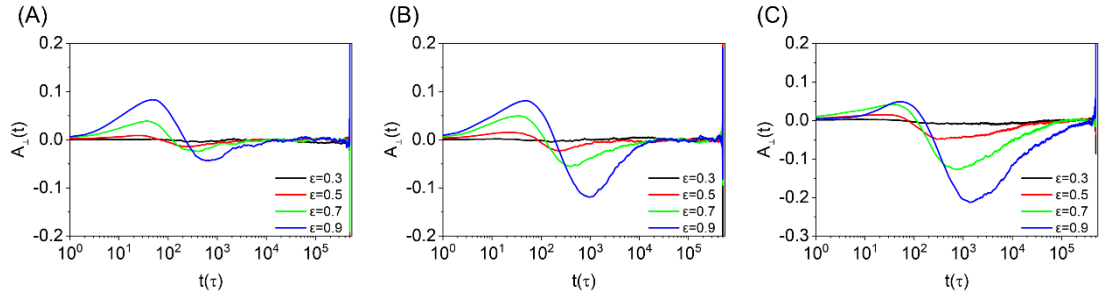

Fig. S5 Perpendicular anisotropic diffusion parameters  $A_{\perp}(t)$  of JNPs with the non-adhesive component fixed at  $\varepsilon = 0.1k_{\text{B}}T$  in cross-linked networks of varying stiffness. (A) soft network ( $k_a = 2.5k_{\text{B}}T/\text{rad}^2$ ), (B) semi-flexible network ( $k_a = 25k_{\text{B}}T/\text{rad}^2$ ), (C) rigid network ( $k_a = 250k_{\text{B}}T/\text{rad}^2$ ). The adhesive-side  $\varepsilon$  is varied from  $0.3$  to  $0.9k_{\text{B}}T$ .

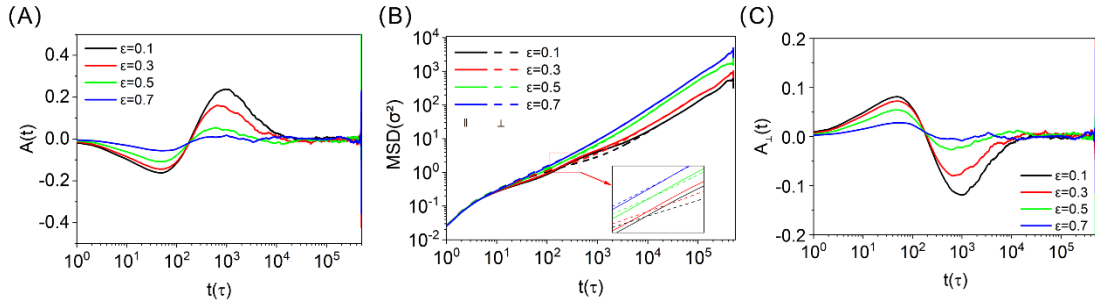

Fig. S6 Anisotropic dynamics of JNPs with the adhesive component fixed at  $\varepsilon=0.9k_{\text{B}}T$  and the non-adhesive side varied from  $0.1$  to  $0.7k_{\text{B}}T$  in semi-flexible networks ( $k_a = 25k_{\text{B}}T/\text{rad}^2$ ). (A) Anisotropic parameter; (B) parallel and perpendicular MSDs; (C) perpendicular anisotropic parameter.

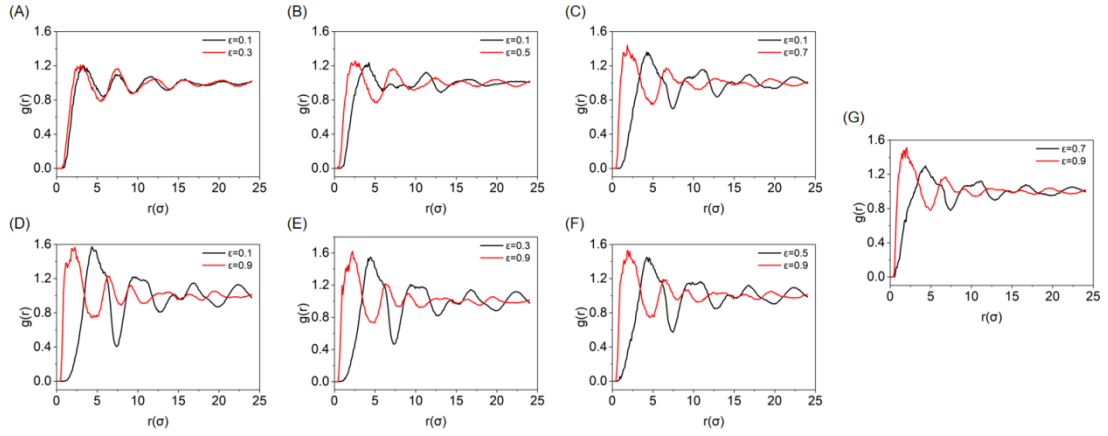

Fig. S7 Radial distribution function (RDF) plots of JNPs in cross-linked networks with  $k_a = 25k_B T/\text{rad}^2$ . (A)  $\varepsilon = 0.1$  and  $0.3k_B T$ , (B)  $\varepsilon = 0.1$  and  $0.5k_B T$ , (C)  $\varepsilon = 0.1$  and  $0.7k_B T$ , (D)  $\varepsilon = 0.1$  and  $0.9k_B T$ , (E)  $\varepsilon = 0.3$  and  $0.9k_B T$ , (F)  $\varepsilon = 0.5$  and  $0.9k_B T$ , (G)  $\varepsilon = 0.7$  and  $0.9k_B T$ .

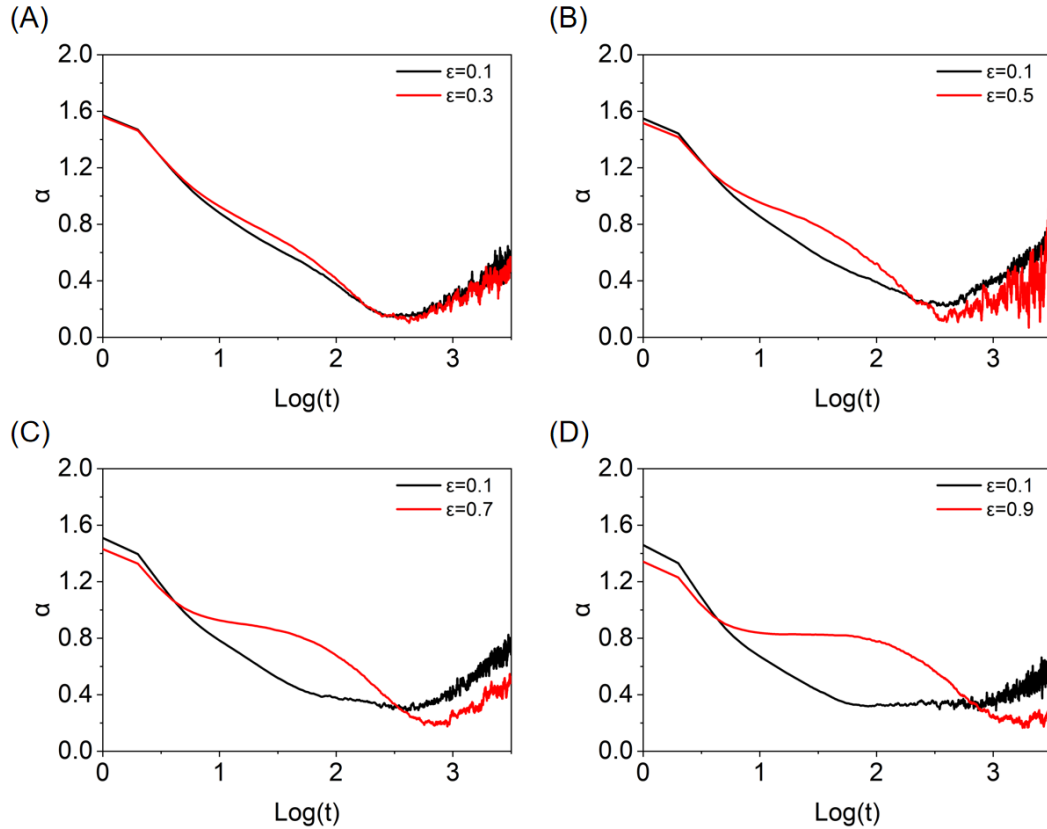

Fig. S8 Anomalous diffusion exponents  $\alpha$  of the two vertices of JNPs in cross-linked networks with  $k_a = 25k_B T/\text{rad}^2$ . (A)  $\varepsilon = 0.1$  and  $0.3k_B T$ , (B)  $\varepsilon = 0.1$  and  $0.5k_B T$ , (C)  $\varepsilon = 0.1$  and  $0.7k_B T$ , (D)  $\varepsilon = 0.1$  and  $0.9k_B T$ .

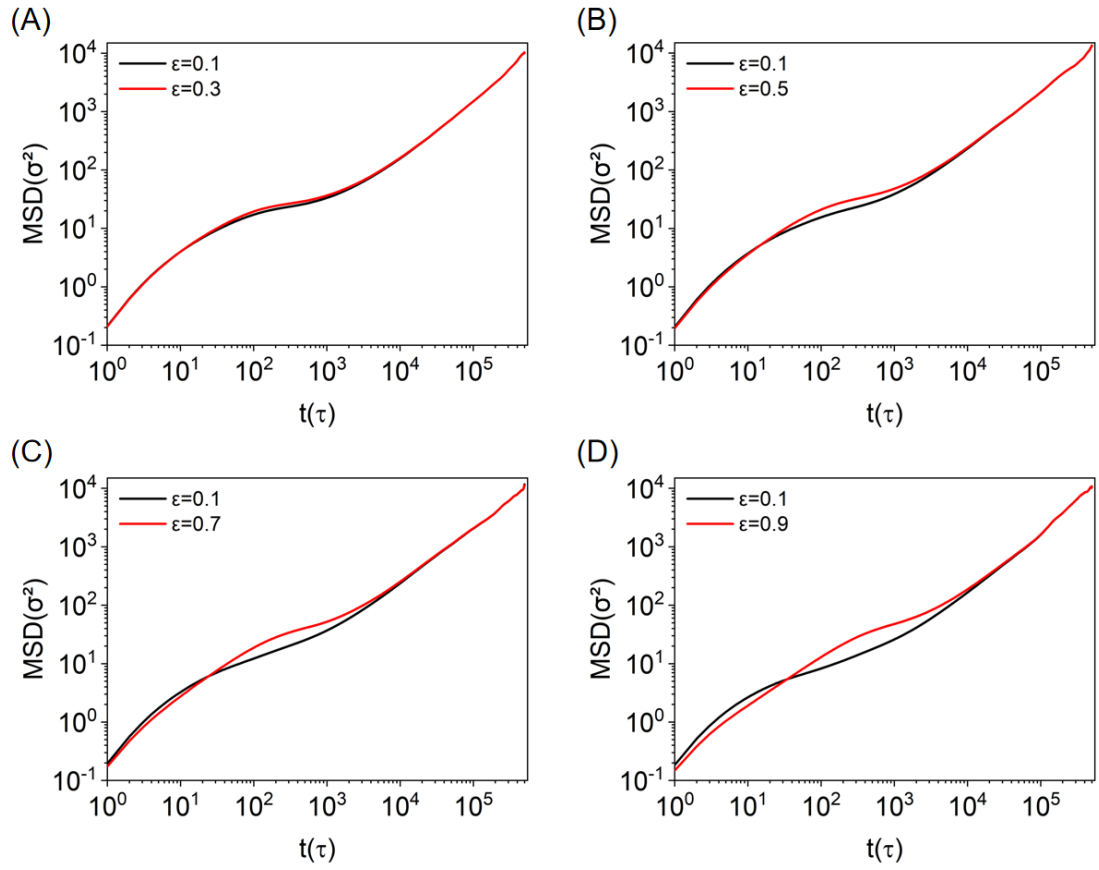

Fig. S9 MSDs of the two vertices of JNPs in cross-linked networks with  $k_a = 2.5 k_B T / \text{rad}^2$ . (A)  $\varepsilon = 0.1$  and  $0.3 k_B T$ , (B)  $\varepsilon = 0.1$  and  $0.5 k_B T$ , (C)  $\varepsilon = 0.1$  and  $0.7 k_B T$ , (D)  $\varepsilon = 0.1$  and  $0.9 k_B T$ .

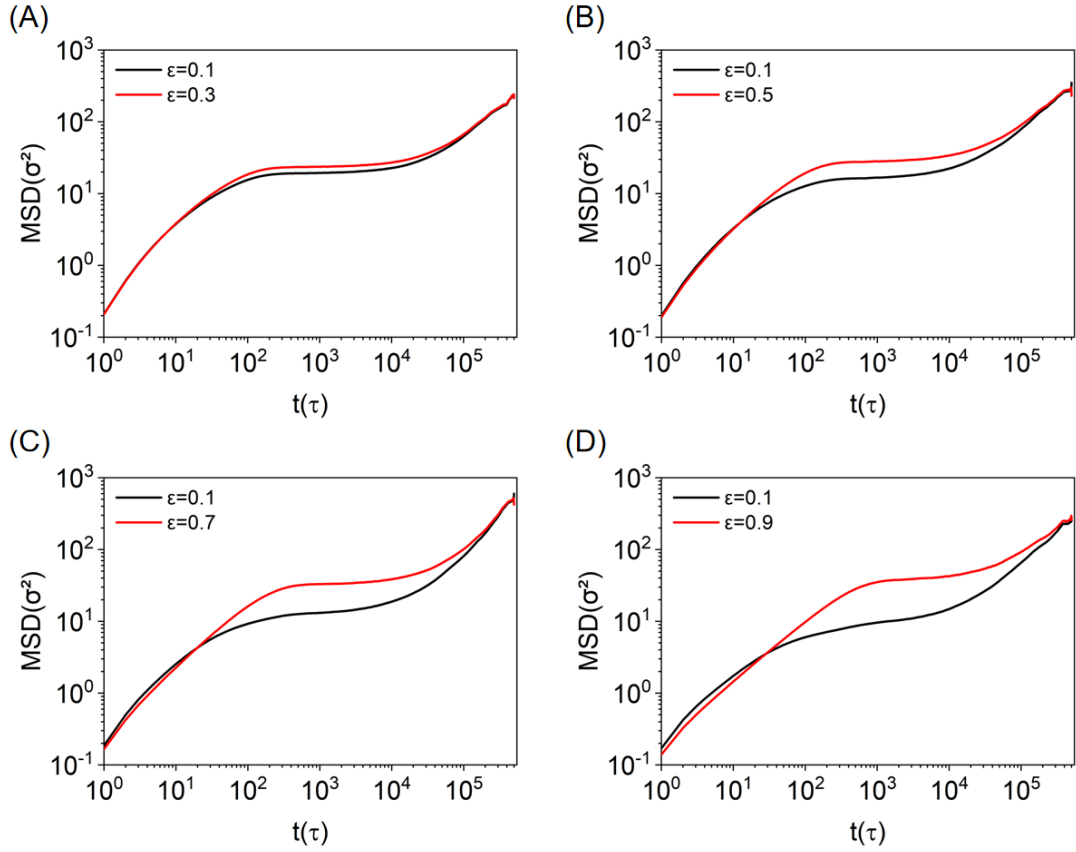

Fig. S10 MSDs of the two vertices of JNPs in cross-linked networks with  $k_a = 250 k_B T / \text{rad}^2$ . (A)  $\varepsilon = 0.1$  and  $0.3 k_B T$ , (B)  $\varepsilon = 0.1$  and  $0.5 k_B T$ , (C)  $\varepsilon = 0.1$  and  $0.7 k_B T$ , (D)  $\varepsilon = 0.1$  and  $0.9 k_B T$ .

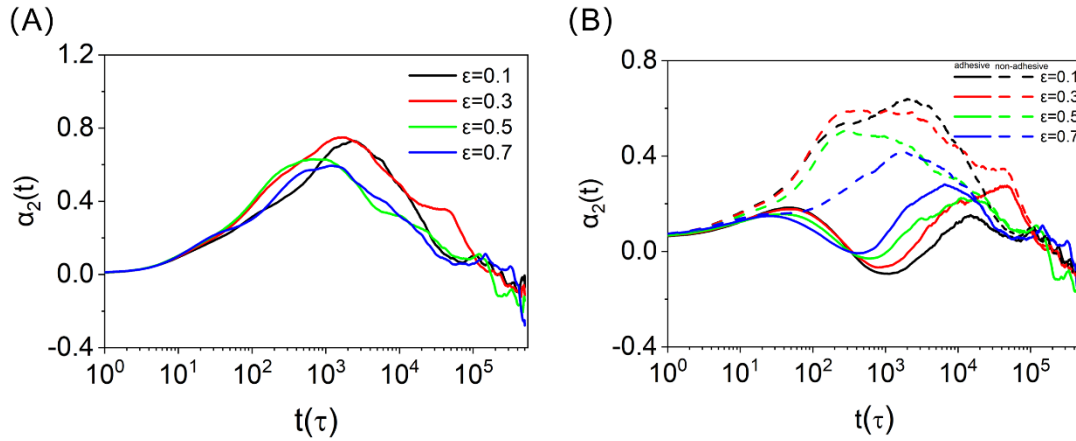

Fig. S11 Non-Gaussian parameters of JNPs with the adhesive component fixed at  $\varepsilon = 0.9 k_B T$  and the non-adhesive side varied from  $0.1$  to  $0.7 k_B T$  in semi-flexible networks ( $k_a = 25 k_B T / \text{rad}^2$ ). (A) Results of JNP centers; (B) results of two vertices of JNPs.

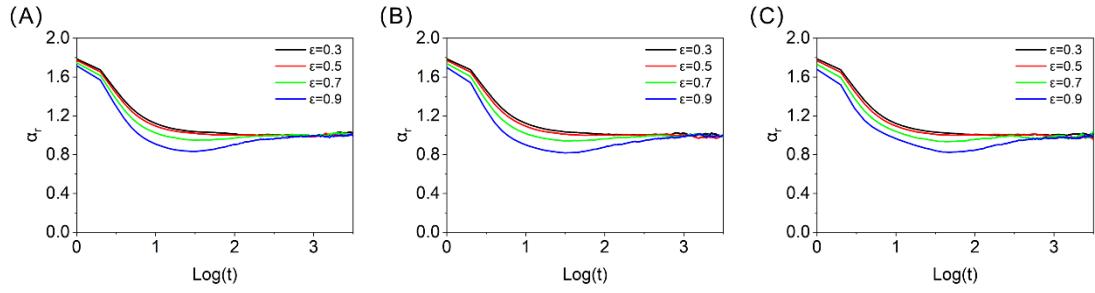

Fig. S12 Anomalous rotational diffusion exponents  $\alpha_r$  of JNPs with the non-adhesive component fixed at  $\varepsilon = 0.1k_B T$  in cross-linked networks of varying stiffness. (A) soft network ( $k_a = 2.5k_B T/\text{rad}^2$ ), (B) semi-flexible network ( $k_a = 25k_B T/\text{rad}^2$ ), (C) rigid network ( $k_a = 250k_B T/\text{rad}^2$ ). The adhesive-side  $\varepsilon$  is varied from 0.3 to  $0.9k_B T$ .

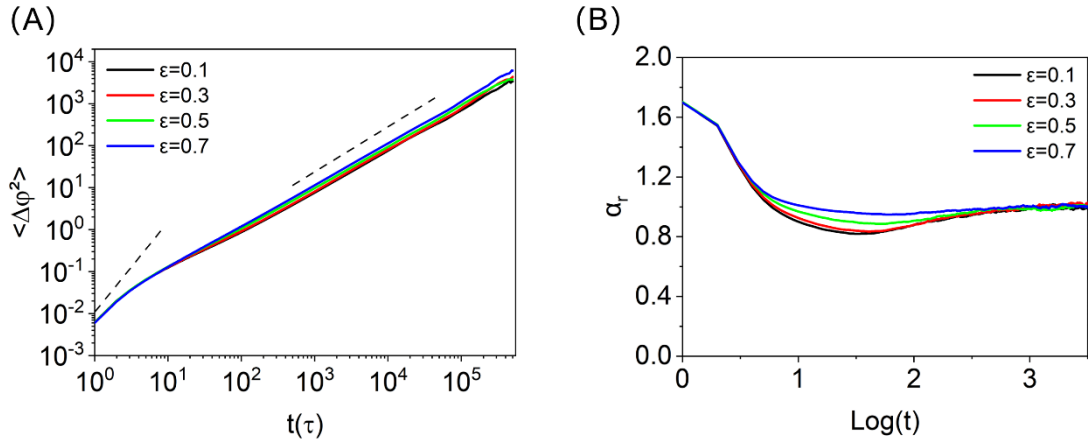

Fig. S13 Anomalous rotational diffusion exponents  $\alpha_r$  of JNPs with the adhesive component fixed at  $\varepsilon=0.9k_B T$  and the non-adhesive side varied from 0.1 to  $0.7k_B T$  in semi-flexible networks ( $k_a = 25k_B T/\text{rad}^2$ ). (A) Mean square angular displacement (MSAD); (B) anomalous rotational diffusion exponents  $\alpha_r$  corresponding to the MSAD in (A).
